# Supplementary material
Source: PubMed Central journal article supplement (PMC8796656)

## **Supplemental Material**

This appendix has been provided by the authors to give readers additional information about their work.

Supplement to: San-Miguel J, Avet-Loiseau H, Paiva B, et al. Sustained Minimal Residual Disease Negativity in Newly Diagnosed Multiple Myeloma and the Impact of Daratumumab in MAIA and ALCYONE

**Supplemental Table 1. Summary of Diagnostic or Baseline Bone Marrow Aspirate Sample Calibration Rate Based on the ClonoSEQ V2.0 Assay Among Patients in the ITT Population who Achieved a Best Response of  $\geq$ CR**

|                                                     | MAIA        |            |             | ALCYONE     |            |             |
|-----------------------------------------------------|-------------|------------|-------------|-------------|------------|-------------|
|                                                     | D-Rd        | Rd         | Total       | D-VMP       | VMP        | Total       |
| Analysis set: ITT with $\geq$ CR                    | n = 182     | n = 100    | n = 282     | n = 160     | n = 90     | n = 250     |
| Patients with sample for testing <sup>a</sup>       | 179 (98.4%) | 95 (95.0%) | 274 (97.2%) | 153 (95.6%) | 83 (92.2%) | 236 (94.4%) |
| Patients with calibration success <sup>b,c</sup>    | 168 (93.9%) | 87 (91.6%) | 255 (93.1%) | 142 (92.8%) | 75 (90.4%) | 217 (91.9%) |
| Patients with calibration failure <sup>b,d</sup>    | 7 (3.9%)    | 6 (6.3%)   | 13 (4.7%)   | 8 (5.2%)    | 8 (9.6%)   | 16 (6.8%)   |
| Patients with unsuccessful assay run <sup>b,e</sup> | 4 (2.2%)    | 2 (2.1%)   | 6 (2.2%)    | 3 (2.0%)    | 0          | 3 (1.3%)    |
| Patients without sample for testing <sup>a,f</sup>  | 3 (1.6%)    | 5 (5.0%)   | 8 (2.8%)    | 7 (4.4%)    | 7 (7.8%)   | 14 (5.6%)   |

ITT, intent-to-treat; CR, complete response; D-Rd, daratumumab plus lenalidomide/dexamethasone; Rd, lenalidomide/dexamethasone; D-VMP, daratumumab plus bortezomib/melphalan/prednisone; VMP, bortezomib/melphalan/prednisone.

<sup>a</sup>Percentages calculated with the number of patients in each treatment group as the denominator.

<sup>b</sup>Percentages calculated with the number of patients with sample for testing as the denominator.

<sup>c</sup>Patients with multiple baseline samples, of which at least one successfully calibrated, are counted as calibration success only.

<sup>d</sup>Sample with no clone identified.

<sup>e</sup>Sample failed QC or not enough DNA.

<sup>f</sup>Includes patients that do not have either or both of a diagnostic or baseline and on-treatment sample collected and available.

**Supplemental Table 2. Demographic and Baseline Disease Characteristics in Patients in MAIA Based on MRD Durability**

| Characteristic                           | MAIA             |                          |                       |                              |                        |                               |                  |                         |                       |                              |                       |                               |
|------------------------------------------|------------------|--------------------------|-----------------------|------------------------------|------------------------|-------------------------------|------------------|-------------------------|-----------------------|------------------------------|-----------------------|-------------------------------|
|                                          | D-Rd             |                          |                       |                              |                        |                               | Rd               |                         |                       |                              |                       |                               |
|                                          | ITT<br>(n = 368) | MRD-negative patients    |                       |                              |                        |                               | ITT<br>(n = 369) | MRD-negative patients   |                       |                              |                       |                               |
|                                          |                  | At any time<br>(n = 106) | ≥6 months<br>(n = 55) | Not ≥6<br>months<br>(n = 51) | ≥12 months<br>(n = 40) | Not ≥12<br>months<br>(n = 66) |                  | At any time<br>(n = 34) | ≥6 months<br>(n = 16) | Not ≥6<br>months<br>(n = 18) | ≥12 months<br>(n = 9) | Not ≥12<br>months<br>(n = 25) |
| Age                                      |                  |                          |                       |                              |                        |                               |                  |                         |                       |                              |                       |                               |
| Median (range), years                    | 73.0 (50-90)     | 72.0 (65-87)             | 72.0 (66-85)          | 73.0 (65-87)                 | 71.0 (66-85)           | 73.5 (65-87)                  | 74.0 (45-89)     | 72.5 (66-87)            | 72.5 (66-87)          | 72.5 (68-84)                 | 71.0 (69-78)          | 73.0 (66-87)                  |
| Distribution, n (%)                      |                  |                          |                       |                              |                        |                               |                  |                         |                       |                              |                       |                               |
| <75 years                                | 208 (56.5%)      | 68 (64.2%)               | 37 (67.3%)            | 31 (60.8%)                   | 31 (77.5%)             | 37 (56.1%)                    | 208 (56.4%)      | 20 (58.8%)              | 9 (56.3%)             | 11 (61.1%)                   | 6 (66.7%)             | 14 (56.0%)                    |
| ≥75 years                                | 160 (43.5%)      | 38 (35.8%)               | 18 (32.7%)            | 20 (39.2%)                   | 9 (22.5%)              | 29 (43.9%)                    | 161 (43.6%)      | 14 (41.2%)              | 7 (43.8%)             | 7 (38.9%)                    | 3 (33.3%)             | 11 (44.0%)                    |
| Sex, n (%)                               |                  |                          |                       |                              |                        |                               |                  |                         |                       |                              |                       |                               |
| Male                                     | 189 (51.4%)      | 58 (54.7%)               | 34 (31.8%)            | 24 (47.1%)                   | 25 (62.5%)             | 33 (50.0%)                    | 195 (52.8%)      | 23 (67.6%)              | 8 (50.0%)             | 15 (83.3%)                   | 5 (55.6%)             | 18 (72.0%)                    |
| Female                                   | 179 (48.6%)      | 48 (45.3%)               | 21 (38.2%)            | 27 (52.9%)                   | 15 (37.5%)             | 33 (50.0%)                    | 174 (47.2%)      | 11 (32.4%)              | 8 (50.0%)             | 3 (16.7%)                    | 4 (44.4%)             | 7 (28.0%)                     |
| Race, n (%)                              |                  |                          |                       |                              |                        |                               |                  |                         |                       |                              |                       |                               |
| White                                    | 336 (91.3%)      | 101 (95.3%)              | 54 (98.2%)            | 47 (92.2%)                   | 39 (97.5%)             | 62 (93.9%)                    | 339 (91.9%)      | 33 (97.1%)              | 16 (100.0%)           | 17 (94.4%)                   | 9 (100.0%)            | 24 (96.0%)                    |
| Non-White <sup>a</sup>                   | 32 (8.7%)        | 5 (4.7%)                 | 1 (1.8%)              | 4 (7.8%)                     | 1 (2.5%)               | 4 (6.1%)                      | 30 (8.1%)        | 1 (2.9%)                | 0                     | 1 (5.6%)                     | 0                     | 1 (4.0%)                      |
| ECOG performance status, n (%)           |                  |                          |                       |                              |                        |                               |                  |                         |                       |                              |                       |                               |
| 0                                        | 127 (34.5%)      | 42 (39.6%)               | 20 (36.4%)            | 22 (43.1%)                   | 12 (30.0%)             | 30 (45.5%)                    | 123 (33.3%)      | 8 (23.5%)               | 2 (12.5%)             | 6 (33.3%)                    | 2 (22.2%)             | 6 (24.0%)                     |
| 1                                        | 178 (48.4%)      | 47 (44.3%)               | 24 (43.6%)            | 23 (45.1%)                   | 18 (45.0%)             | 29 (43.9%)                    | 187 (50.7%)      | 15 (44.1%)              | 10 (62.5%)            | 5 (27.8%)                    | 6 (66.7%)             | 9 (36.0%)                     |
| ≥2                                       | 63 (17.1%)       | 17 (16.0%)               | 11 (20.0%)            | 6 (11.8%)                    | 10 (25.0%)             | 7 (10.6%)                     | 59 (16.0%)       | 11 (32.4%)              | 4 (25.0%)             | 7 (38.9%)                    | 1 (11.1%)             | 10 (40.0%)                    |
| Type of measurable disease, n (%)        |                  |                          |                       |                              |                        |                               |                  |                         |                       |                              |                       |                               |
| IgG                                      | 225 (61.1%)      | 57 (53.8%)               | 17 (30.9%)            | 22 (43.1%)                   | 12 (30.0%)             | 27 (40.9%)                    | 231 (62.6%)      | 24 (70.6%)              | 10 (62.5%)            | 11 (61.1%)                   | 7 (77.8%)             | 14 (56.0%)                    |
| IgA                                      | 65 (17.7%)       | 27 (25.5%)               | 11 (20.0%)            | 9 (17.6%)                    | 7 (17.5%)              | 13 (19.7%)                    | 66 (17.9%)       | 5 (14.7%)               | 3 (18.8%)             | 2 (11.1%)                    | 0                     | 5 (20.0%)                     |
| Detected in urine only                   | 40 (10.9%)       | 15 (14.2%)               | 8 (14.5%)             | 7 (13.7%)                    | 7 (17.5%)              | 8 (12.1%)                     | 34 (9.2%)        | 1 (2.9%)                | 1 (6.3%)              | 0                            | 0                     | 1 (4.0%)                      |
| Detected in serum free light chains only | 29 (7.9%)        | 7 (6.6%)                 | 2 (3.6%)              | 5 (9.8%)                     | 0                      | 7 (10.6%)                     | 28 (7.6%)        | 3 (8.8%)                | 1 (6.3%)              | 2 (11.1%)                    | 1 (11.1%)             | 2 (8.0%)                      |
| ISS disease stage <sup>b</sup> , n (%)   |                  |                          |                       |                              |                        |                               |                  |                         |                       |                              |                       |                               |
| I                                        | 98 (26.6%)       | 24 (22.6%)               | 11 (20.0%)            | 13 (25.5%)                   | 10 (25.0%)             | 14 (21.2%)                    | 103 (27.9%)      | 11 (32.4%)              | 6 (37.5%)             | 5 (27.8%)                    | 5 (55.6%)             | 6 (24.0%)                     |
| II                                       | 163 (44.3%)      | 55 (51.9%)               | 30 (54.5%)            | 25 (49.0%)                   | 19 (47.5%)             | 36 (54.5%)                    | 156 (42.3%)      | 15 (44.1%)              | 6 (37.5%)             | 9 (50.0%)                    | 3 (33.3%)             | 12 (48.0%)                    |
| III                                      | 107 (29.1%)      | 27 (25.5%)               | 14 (25.5%)            | 13 (25.5%)                   | 11 (27.5%)             | 16 (24.2%)                    | 110 (29.8%)      | 8 (23.5%)               | 4 (25.0%)             | 4 (22.2%)                    | 1 (11.1%)             | 7 (28.0%)                     |
| Cytogenetic profile <sup>c</sup>         |                  |                          |                       |                              |                        |                               |                  |                         |                       |                              |                       |                               |

|                                                                           |             |            |            |            |            |            |             |            |             |            |            |            |
|---------------------------------------------------------------------------|-------------|------------|------------|------------|------------|------------|-------------|------------|-------------|------------|------------|------------|
| Patients evaluated                                                        | 319         | 96         | 47         | 49         | 34         | 62         | 323         | 27         | 12          | 15         | 8          | 19         |
| Standard-risk<br>cytogenetic<br>abnormality, n (%)                        | 271 (85.0%) | 85 (88.5%) | 42 (89.4%) | 43 (87.8%) | 29 (85.3%) | 56 (90.3%) | 279 (86.4%) | 26 (96.3%) | 12 (100.0%) | 14 (93.3%) | 8 (100.0%) | 18 (94.7%) |
| High-risk<br>cytogenetic<br>abnormality <sup>d</sup> , n (%)              | 48 (15.0%)  | 11 (11.5%) | 5 (10.6%)  | 6 (12.2%)  | 5 (14.7%)  | 6 (9.7%)   | 44 (13.6%)  | 1 (3.7%)   | 0           | 1 (6.7%)   | 0          | 1 (5.3%)   |
| del(17p)                                                                  | 25 (7.8%)   | 6 (6.3%)   | 2 (4.3%)   | 4 (8.2%)   | 2 (5.9%)   | 4 (6.5%)   | 29 (9.0%)   | 0          | 0           | 0          | 0          | 0          |
| Median time since<br>initial diagnosis of<br>multiple myeloma<br>(months) | 0.95        | 0.94       | 0.85       | 1.15       | 0.69       | 1.18       | 0.89        | 0.89       | 1.07        | 0.76       | 1.08       | 0.76       |

MRD, minimal residual disease; D-Rd, daratumumab plus lenalidomide/dexamethasone; Rd, lenalidomide/dexamethasone; ITT, intent to treat; ECOG, Eastern Cooperative Oncology Group; Ig, immunoglobulin; ISS, International Staging System.

All data are n (%), unless otherwise indicated.

<sup>a</sup>Includes Black or African-American, Asian, other, unknown, and not reported.

<sup>b</sup>ISS staging is derived based on the combination of serum  $\beta$ 2-microglobulin and albumin.

<sup>c</sup>Cytogenetic risk status was determined by fluorescence in situ hybridization or karyotype testing.

<sup>d</sup>High risk is defined as having a positive test for any of the del17p, t(14;16), or t(4;14) molecular abnormalities.

**Supplemental Table 3. Demographic and Baseline Disease Characteristics in Patients in ALCYONE Based on MRD**

**Durability**

| Characteristic                                 | ALCYONE          |                         |                       |                              |                           |                               |                  |                            |                       |                             |                           |                               |
|------------------------------------------------|------------------|-------------------------|-----------------------|------------------------------|---------------------------|-------------------------------|------------------|----------------------------|-----------------------|-----------------------------|---------------------------|-------------------------------|
|                                                | D-VMP            |                         |                       |                              |                           |                               | VMP              |                            |                       |                             |                           |                               |
|                                                | ITT<br>(n = 350) | MRD-negative patients   |                       |                              |                           |                               | ITT<br>(n = 356) | MRD-negative patients      |                       |                             |                           |                               |
|                                                |                  | At any time<br>(n = 94) | ≥6 months<br>(n = 55) | Not ≥6<br>months<br>(n = 39) | ≥12<br>months<br>(n = 49) | Not ≥12<br>months<br>(n = 45) |                  | At any<br>time<br>(n = 25) | ≥6 months<br>(n = 16) | Not ≥6<br>months<br>(n = 9) | ≥12<br>months<br>(n = 10) | Not ≥12<br>months<br>(n = 15) |
| Age                                            |                  |                         |                       |                              |                           |                               |                  |                            |                       |                             |                           |                               |
| Median (range),<br>years                       | 71.0 (40-93)     | 71.0 (40-93)            | 71.0 (40-87)          | 71.0 (56-93)                 | 71.0 (40-87)              | 71.0 (56-93)                  | 71.0 (50-91)     | 73.0 (52-82)               | 73.0 (52-82)          | 74.0(67-81)                 | 72.0 (52-82)              | 74.0 (67-82)                  |
| Distribution, n<br>(%)                         |                  |                         |                       |                              |                           |                               |                  |                            |                       |                             |                           |                               |
| <75 years                                      | 246 (70.3%)      | 68 (72.3%)              | 39 (70.9%)            | 29 (74.4%)                   | 36 (73.5%)                | 32 (71.1%)                    | 249 (69.9%)      | 15 (60.0%)                 | 10 (62.5%)            | 5 (55.6%)                   | 6 (60.0%)                 | 9 (60.0%)                     |
| ≥75 years                                      | 104 (29.7%)      | 26 (27.7%)              | 16 (29.1%)            | 10 (25.6%)                   | 13 (26.5%)                | 13 (28.9%)                    | 107 (30.1%)      | 10 (40.0%)                 | 6 (37.5%)             | 4 (44.4%)                   | 4 (40.0%)                 | 6 (40.0%)                     |
| Sex, n (%)                                     |                  |                         |                       |                              |                           |                               |                  |                            |                       |                             |                           |                               |
| Male                                           | 160 (45.7%)      | 35 (37.2%)              | 17 (30.9%)            | 18 (46.2%)                   | 14 (28.6%)                | 21 (46.7%)                    | 167 (46.9%)      | 10 (40.0%)                 | 5 (31.3%)             | 5 (55.6%)                   | 4 (40.0%)                 | 6 (40.0%)                     |
| Female                                         | 190 (54.3%)      | 59 (62.8%)              | 38 (69.1%)            | 21 (53.8%)                   | 35 (71.4%)                | 24 (53.3%)                    | 189 (53.1%)      | 15 (60.0%)                 | 11 (68.8%)            | 4 (44.4%)                   | 6 (60.0%)                 | 9 (60.0%)                     |
| Race, n (%)                                    |                  |                         |                       |                              |                           |                               |                  |                            |                       |                             |                           |                               |
| White                                          | 297 (84.9%)      | 76 (80.9%)              | 47 (85.5%)            | 29 (74.4%)                   | 41 (83.7%)                | 35 (77.8%)                    | 304 (85.4%)      | 23 (92.0%)                 | 14 (87.5%)            | 9 (100.0%)                  | 8 (80.0%)                 | 15 (100.0%)                   |
| Non-White <sup>a</sup>                         | 53 (15.1%)       | 18 (19.1%)              | 8 (14.5%)             | 10 (25.6%)                   | 8 (16.3%)                 | 10 (22.2%)                    | 52 (14.6%)       | 2 (8.0%)                   | 2 (12.5%)             | 0                           | 2 (20.0%)                 | 0                             |
| ECOG<br>performance status,<br>n (%)           |                  |                         |                       |                              |                           |                               |                  |                            |                       |                             |                           |                               |
| 0                                              | 78 (22.3%)       | 17 (18.1%)              | 11 (20.0%)            | 6 (15.4%)                    | 11 (22.4%)                | 6 (13.3%)                     | 99 (27.8%)       | 7 (28.0%)                  | 4 (25.0%)             | 3 (33.3%)                   | 2 (20.0%)                 | 5 (33.3%)                     |
| 1                                              | 182 (52.0%)      | 51 (54.3%)              | 27 (49.1%)            | 24 (61.5%)                   | 22 (44.9%)                | 29 (64.4%)                    | 173 (48.6%)      | 10 (40.0%)                 | 8 (50.0%)             | 2 (22.2%)                   | 4 (40.0%)                 | 6 (40.0%)                     |
| 2                                              | 90 (25.7%)       | 26 (27.7%)              | 17 (30.9%)            | 9 (23.1%)                    | 16 (32.7%)                | 10 (22.2%)                    | 84 (23.6%)       | 8 (32.0%)                  | 4 (25.0%)             | 4 (44.4%)                   | 4 (40.0%)                 | 4 (26.7%)                     |
| Type of<br>measurable<br>disease, n (%)        |                  |                         |                       |                              |                           |                               |                  |                            |                       |                             |                           |                               |
| IgG                                            | 143 (40.9%)      | 31 (33.0%)              | 19 (34.5%)            | 12 (30.8%)                   | 18 (36.7%)                | 13 (28.9%)                    | 140 (39.3%)      | 8 (32.0%)                  | 4 (25.0%)             | 4 (44.4%)                   | 4 (40.0%)                 | 4 (26.7%)                     |
| IgA                                            | 49 (14.0%)       | 12 (12.8%)              | 7 (12.7%)             | 5 (12.8%)                    | 6 (12.2%)                 | 6 (13.3%)                     | 53 (14.9%)       | 5 (20.0%)                  | 4 (25.0%)             | 1 (11.1%)                   | 1 (10.0%)                 | 4 (26.7%)                     |
| Detected in<br>urine only                      | 43 (12.3%)       | 16 (17.0%)              | 12 (21.8%)            | 4 (10.3%)                    | 11 (22.4%)                | 5 (11.1%)                     | 37 (10.4%)       | 7 (28.0%)                  | 5 (31.3%)             | 2 (22.2%)                   | 3 (30.0%)                 | 4 (26.7%)                     |
| Detected in<br>serum free light<br>chains only | 18 (5.1%)        | 7 (7.4%)                | 3 (5.5%)              | 4 (10.3%)                    | 2 (4.1%)                  | 5 (11.1%)                     | 18 (5.1%)        | 2 (8.0%)                   | 1 (6.3%)              | 1 (11.1%)                   | 1 (10.0%)                 | 1 (6.7%)                      |

|                                                                  |             |            |            |            |            |            |             |            |            |           |           |            |
|------------------------------------------------------------------|-------------|------------|------------|------------|------------|------------|-------------|------------|------------|-----------|-----------|------------|
| ISS disease stage <sup>b</sup> , n (%)                           |             |            |            |            |            |            |             |            |            |           |           |            |
| I                                                                | 69 (19.7%)  | 16 (17.0%) | 9 (16.4%)  | 7 (17.9%)  | 9 (18.4%)  | 7 (15.6%)  | 67 (18.8%)  | 5 (20.0%)  | 3 (18.8%)  | 2 (22.2%) | 2 (20.0%) | 3 (20.0%)  |
| II                                                               | 139 (39.7%) | 39 (41.5%) | 25 (45.5%) | 14 (35.9%) | 23 (46.9%) | 16 (35.6%) | 160 (44.9%) | 10 (40.0%) | 6 (37.5%)  | 4 (44.4%) | 5 (50.0%) | 5 (33.3%)  |
| III                                                              | 142 (40.6%) | 39 (41.5%) | 21 (38.2%) | 18 (46.2%) | 17 (34.7%) | 22 (48.9%) | 129 (36.2%) | 10 (40.0%) | 7 (43.8%)  | 3 (33.3%) | 3 (30.0%) | 7 (46.7%)  |
| Cytogenetic profile <sup>c</sup>                                 |             |            |            |            |            |            |             |            |            |           |           |            |
| Patients evaluated                                               | 314         | 88         | 52         | 36         | 46         | 42         | 302         | 23         | 14         | 9         | 9         | 14         |
| Standard-risk cytogenetic abnormality, n (%)                     | 261 (83.1%) | 74 (84.1%) | 46 (88.5%) | 28 (77.8%) | 40 (87.0%) | 34 (81.0%) | 257 (85.1%) | 19 (82.6%) | 11 (78.6%) | 8 (88.9%) | 7 (77.8%) | 12 (85.7%) |
| High-risk cytogenetic abnormality <sup>d</sup> , n (%)           | 53 (16.9%)  | 14 (15.9%) | 6 (11.5%)  | 8 (22.2%)  | 6 (13.0%)  | 8 (19.0%)  | 45 (14.9%)  | 4 (17.4%)  | 3 (21.4%)  | 1 (11.1%) | 2 (22.2%) | 2 (14.3%)  |
| del(17p)                                                         | 29 (9.2%)   | 8 (9.1%)   | 4 (7.7%)   | 4 (11.1%)  | 4 (8.7%)   | 4 (9.5%)   | 27 (8.9%)   | 3 (13.0%)  | 2 (14.3%)  | 1 (11.1%) | 1 (11.1%) | 2 (14.3%)  |
| Median time since initial diagnosis of multiple myeloma (months) | 0.76        | 0.79       | 0.92       | 0.66       | 0.92       | 0.66       | 0.82        | 0.85       | 1.05       | 0.69      | 1.40      | 0.69       |

MRD, minimal residual disease; D-VMP, daratumumab plus bortezomib/melphalan/prednisone; VMP, bortezomib/melphalan/prednisone; ITT, intent to treat; ECOG, Eastern Cooperative Oncology Group; Ig, immunoglobulin; ISS, International Staging System.

All data are n (%), unless otherwise indicated.

<sup>a</sup>Includes Black or African-American, Asian, other, unknown, and not reported.

<sup>b</sup>ISS staging is derived based on the combination of serum  $\beta$ 2-microglobulin and albumin.

<sup>c</sup>Cytogenetic risk status was determined by fluorescence in situ hybridization or karyotype testing.

<sup>d</sup>High risk is defined as having a positive test for any of the del17p, t(14;16) or t(4;14) molecular abnormalities.

**Supplemental Table 4. Progression-free Survival on Next Subsequent Line of Therapy Based on MRD Status**

|                                                                       | MAIA                                             |                          | ALCYONE                                          |                          |
|-----------------------------------------------------------------------|--------------------------------------------------|--------------------------|--------------------------------------------------|--------------------------|
|                                                                       | D-Rd<br>n = 368 (ITT)                            | Rd<br>n = 369 (ITT)      | D-VMP<br>n = 350 (ITT)                           | VMP<br>n = 356 (ITT)     |
| <b>PFS2<sup>a</sup></b>                                               |                                                  |                          |                                                  |                          |
| MRD negative ( $10^{-5}$ ) at $\geq 1$ time point, n (%) <sup>b</sup> | 106 (28.8%)                                      | 34 (9.2%)                | 94 (26.9%)                                       | 25 (7.0%)                |
| Number of events (%); number censored (%) <sup>c</sup>                | 6 (5.7%); 100 (94.3%)                            | 4 (11.8%); 30 (88.2%)    | 15 (16.0%); 79 (84.0%)                           | 4 (16.0%); 21 (84.0%)    |
| Median (95% CI), months                                               | NR (NE-NE)                                       | NR (NE-NE)               | NR (NE-NE)                                       | NR (40.7-NE)             |
| HR (95% CI), <i>P</i> value                                           | 0.43 (0.12-1.55); <i>P</i> = 0.1853 <sup>d</sup> |                          | 1.02 (0.34-3.09); <i>P</i> = 0.9668 <sup>d</sup> |                          |
| 36-month PFS2 rate, % (95% CI)                                        | 95.0 (88.4-97.9)                                 | 83.9 (61.3-93.9)         | 87.0 (78.2-92.4)                                 | 92.0 (71.6-97.9)         |
| MRD positive, n (%) <sup>b</sup>                                      | 262 (71.2%)                                      | 335 (90.8%)              | 256 (73.1%)                                      | 331 (93.0%)              |
| Number of events (%); number censored (%) <sup>c</sup>                | 90 (34.4%); 172 (65.6%)                          | 117 (34.9%); 218 (65.1%) | 87 (34.0%); 169 (66.0%)                          | 148 (44.7%); 183 (55.3%) |
| Median (95% CI), months                                               | NR (41.0-NE)                                     | 47.3 (39.2-NE)           | NR (NE-NE)                                       | 38.0 (34.1-NE)           |
| HR (95% CI), <i>P</i> value                                           | 0.90 (0.68-1.18); <i>P</i> = 0.4457 <sup>c</sup> |                          | 0.64 (0.49-0.83); <i>P</i> = 0.0008 <sup>d</sup> |                          |
| 36-month PFS2 rate, % (95% CI)                                        | 65.5 (59.0-71.3)                                 | 61.5 (55.3-67.0)         | 67.9 (61.6-73.5)                                 | 51.9 (45.9-57.6)         |

MRD, minimal residual disease; D-Rd, daratumumab plus lenalidomide/dexamethasone; Rd, lenalidomide/dexamethasone; D-VMP, daratumumab plus bortezomib/melphalan/prednisone; VMP, bortezomib/melphalan/prednisone; ITT, intent-to-treat; CI, confidence interval; NR, not reached; NE, not evaluable; HR, hazard ratio; PFS2, progression-free survival on next subsequent line of therapy.

<sup>a</sup>PFS2 was defined as the time from randomization to progression on the next line of treatment or death, whichever came first. Disease progression was based on investigator judgment. For those patients who were still alive and not yet progressed on the next line of treatment, they were censored on the last date of follow-up.

<sup>b</sup>Percentages calculated using the total number of patients in each column heading (ITT population) as the denominator.

<sup>c</sup>Percentages calculated using the number of patients in each column from the row immediately above the number of events (%); number censored (%).

<sup>d</sup>HR and 95% CI from a Cox proportional hazards model with treatment group as the sole explanatory variable. A hazard ratio <1 indicates an advantage for D-Rd or D-VMP. *P* value is based on the log-rank test.



**Supplemental Table 5. Cox Proportional Hazards Model for PFS with Time-varying Covariates for MRD Status.**

| <b>Variable</b>                                    | <b>Hazard ratio<br/>(95% CI)</b> | <b>P value</b> |
|----------------------------------------------------|----------------------------------|----------------|
| <i>Univariate analysis</i>                         |                                  |                |
| Response group (MRD negative vs MRD positive)      | 0.18 (0.11-0.28)                 | <0.0001        |
| <i>Multivariate analysis</i>                       |                                  |                |
| Response group (MRD negative vs MRD positive)      | 0.18 (0.11-0.29)                 | <0.0001        |
| Age                                                | 1.00 (0.98-1.01)                 | 0.533          |
| ISS disease stage (II vs I)                        | 1.77 (1.41-2.22)                 | <0.0001        |
| ISS disease stage (III vs I)                       | 1.97 (1.54-2.51)                 | <0.0001        |
| Baseline renal function (>60 mL/min vs ≤60 mL/min) | 1.02 (0.86-1.22)                 | 0.786          |
| Cytogenetic risk (high vs standard)                | 1.52 (1.25-1.86)                 | <0.0001        |

PFS, progression-free survival; MRD, minimal residual disease; CI, confidence interval; ISS, International Staging System; CR, complete response.

Data are for a univariate and multivariate analysis of combined data from the MAIA and ALCYONE studies evaluating the following variables: MRD-negativity status, age, ISS disease stage, baseline renal function, and cytogenetic risk. MRD-negativity rate was defined as the proportion of patients who achieved ≥CR with negative MRD test results at any time during treatment. A patient was considered MRD positive if MRD negativity was not achieved or if a test was inconclusive or missing, or if they did not reach a best response of ≥CR. No patients were missing data for baseline renal function; patients with missing baseline cytogenetic risk groups (MAIA, n = 95; ALCYONE, n = 90) were excluded from the multivariate model.

**Supplemental Figure 1. CONSORT diagrams for MAIA (A) and ALCYONE (B).** D-Rd, daratumumab plus lenalidomide/dexamethasone; ITT, intent to treat; Rd, lenalidomide/dexamethasone; D-VMP, daratumumab plus bortezomib/melphalan/prednisone; VMP, bortezomib/melphalan/prednisone.

**(A) MAIA**

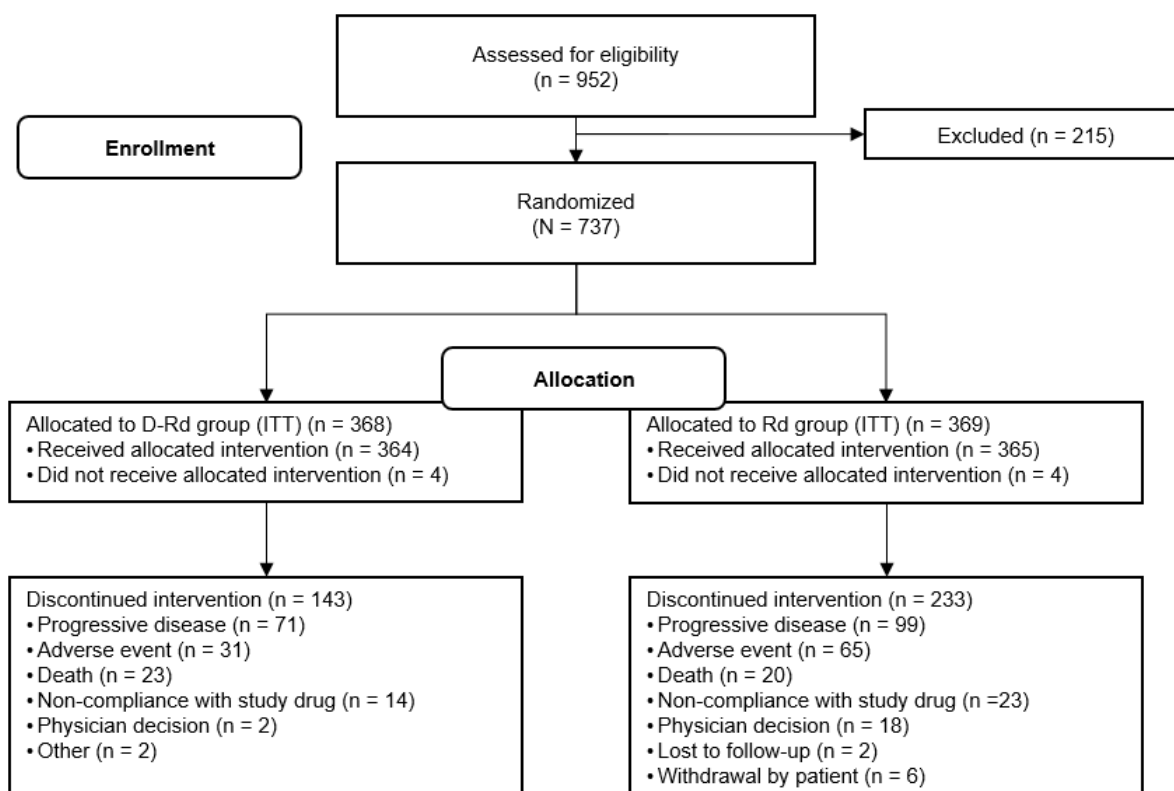

**(B) ALCYONE<sup>11</sup>**

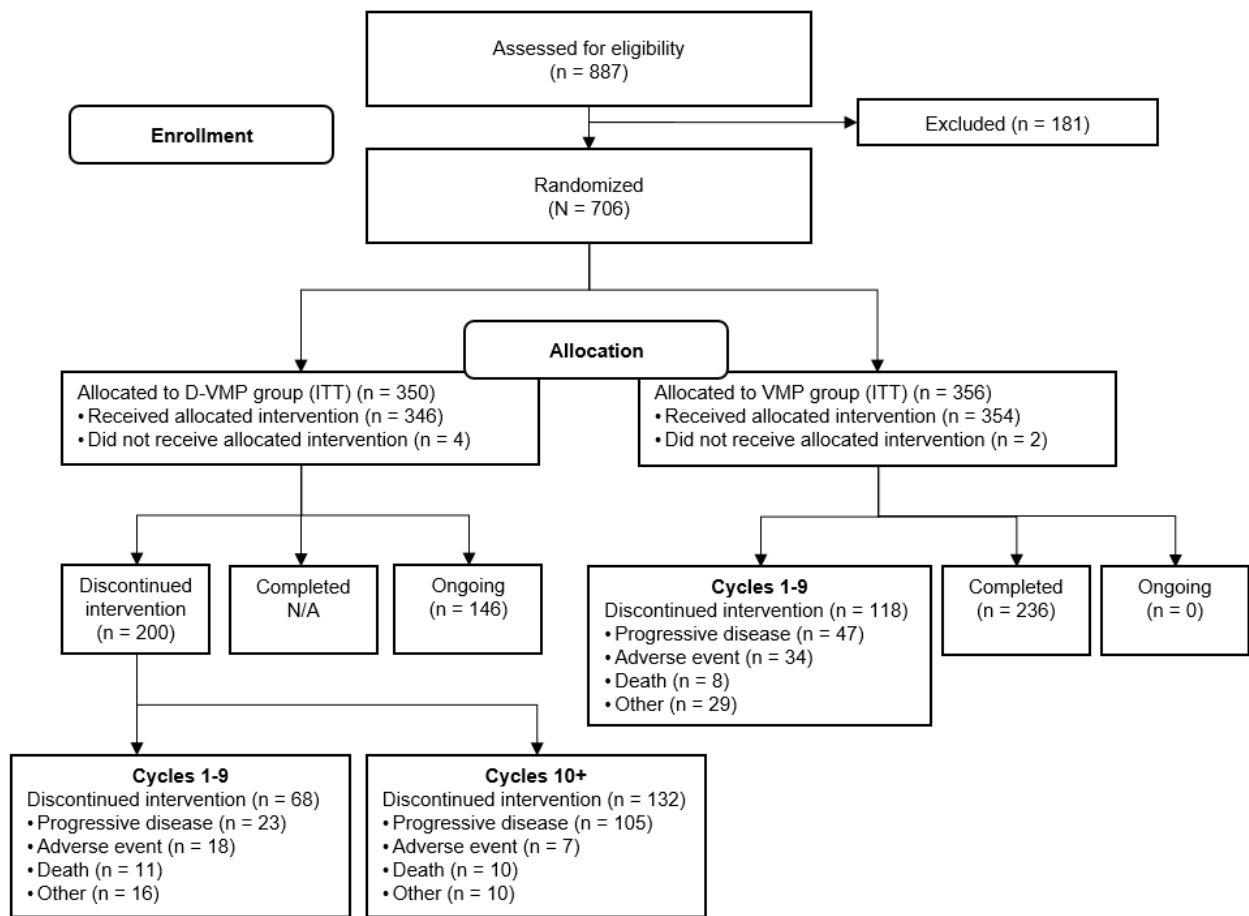

**Supplemental Figure 2. PFS by treatment group based on MRD status ( $10^{-5}$ ) in MAIA (A) and ALCYONE (B).** Shown are Kaplan-Meier estimates of PFS by MRD status among patients in the ITT populations. MRD was assessed at a threshold of 1 tumor cell per  $10^5$  white blood cells. Purple lines show regimens containing daratumumab (D-Rd and D-VMP); orange lines show standard of care regimens (Rd and VMP). PFS, progression-free survival; MRD, minimal residual disease; ITT, intent to treat; D-Rd, daratumumab plus lenalidomide/dexamethasone. D-VMP, daratumumab plus bortezomib/melphalan/prednisone. MRD, minimal residual disease; Rd, lenalidomide/dexamethasone; VMP, bortezomib/melphalan/prednisone.

**A. MAIA**

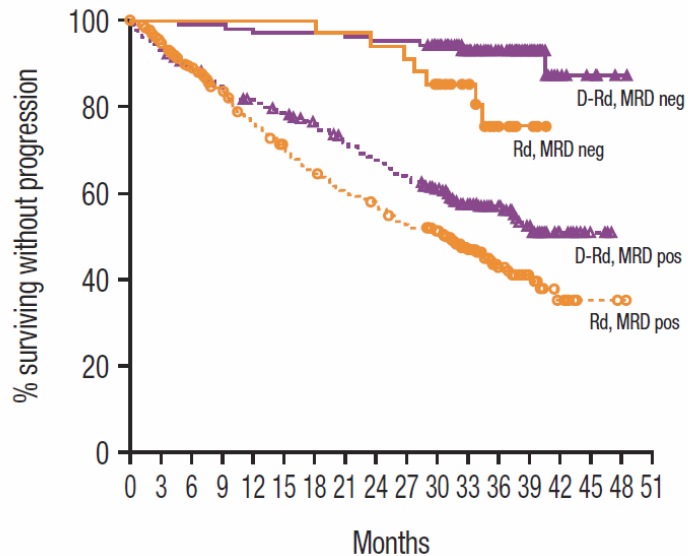

|               | No. at risk |     |     |     |     |     |     |     |     |     |     |     |    |    |    |   |   |   |
|---------------|-------------|-----|-----|-----|-----|-----|-----|-----|-----|-----|-----|-----|----|----|----|---|---|---|
| Rd, MRD neg   | 34          | 34  | 34  | 34  | 34  | 34  | 34  | 33  | 32  | 31  | 27  | 20  | 10 | 4  | 0  | 0 | 0 | 0 |
| D-Rd, MRD neg | 106         | 106 | 105 | 105 | 103 | 103 | 103 | 102 | 101 | 101 | 95  | 73  | 58 | 30 | 8  | 4 | 1 | 0 |
| Rd, MRD pos   | 335         | 299 | 273 | 246 | 220 | 202 | 185 | 171 | 162 | 146 | 134 | 93  | 54 | 29 | 10 | 2 | 1 | 0 |
| D-Rd, MRD pos | 262         | 241 | 230 | 215 | 206 | 197 | 187 | 174 | 165 | 155 | 138 | 101 | 73 | 40 | 16 | 3 | 0 | 0 |

**B. ALCYONE**

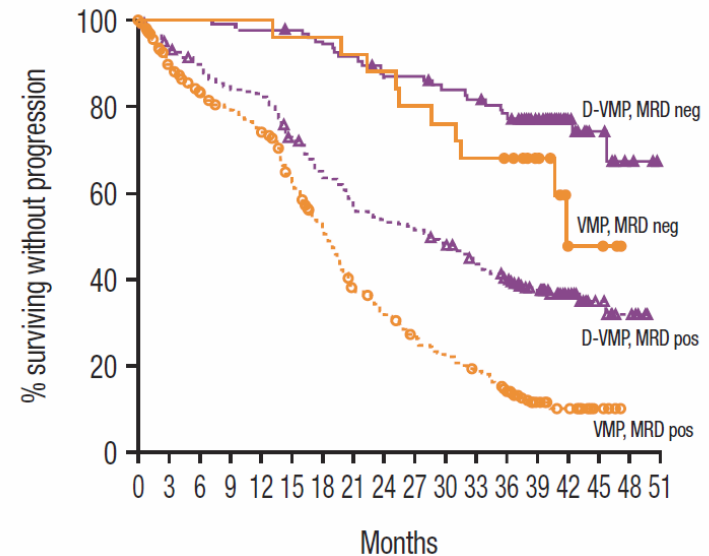

|                | No. at risk |     |     |     |     |     |     |     |     |     |     |    |    |    |    |    |   |   |
|----------------|-------------|-----|-----|-----|-----|-----|-----|-----|-----|-----|-----|----|----|----|----|----|---|---|
| VMP, MRD neg   | 25          | 25  | 25  | 25  | 25  | 24  | 24  | 23  | 22  | 20  | 19  | 17 | 16 | 11 | 3  | 3  | 0 | 0 |
| D-VMP, MRD neg | 94          | 94  | 94  | 93  | 92  | 91  | 89  | 85  | 80  | 80  | 76  | 74 | 70 | 50 | 26 | 12 | 4 | 0 |
| VMP, MRD pos   | 331         | 279 | 253 | 238 | 221 | 183 | 147 | 105 | 88  | 73  | 59  | 50 | 35 | 18 | 12 | 4  | 0 | 0 |
| D-VMP, MRD pos | 256         | 228 | 218 | 205 | 200 | 174 | 154 | 135 | 127 | 122 | 112 | 99 | 90 | 63 | 37 | 14 | 5 | 0 |

**Supplemental Figure 3. PFS based on sustained minimal residual disease (MRD) negativity (10–5; ≥6 months) in MAIA (A), ALCYONE (B), and in both studies pooled (C), and by treatment group for MAIA (D) and ALCYONE (E).** Shown are Kaplan-Meier estimates of PFS by sustained MRD negativity lasting ≥6 months among patients in the ITT populations. MRD status was assessed at a threshold of 1 tumor cell per 10<sup>5</sup> white blood cells. Purple lines show MRD-negative patient populations and orange lines show MRD-positive patient populations in panels A-C (D-Rd/Rd shown for MAIA [A]; D-VMP/VMP for ALCYONE [B]; D-Rd/Rd/D-VMP/VMP for all studies combined [C]); purple lines show regimens containing daratumumab (D-Rd for MAIA [D]; and D-VMP for ALCYONE [E]); orange lines show standard of care regimens (Rd for MAIA [D]; VMP for ALCYONE [E]). PFS, progression-free survival; MRD, minimal residual disease; ITT, intent to treat; D-Rd, daratumumab plus lenalidomide/dexamethasone; Rd, lenalidomide/dexamethasone; D-VMP, daratumumab plus bortezomib/melphalan/prednisone; VMP, bortezomib/melphalan/prednisone.

**A. MAIA**

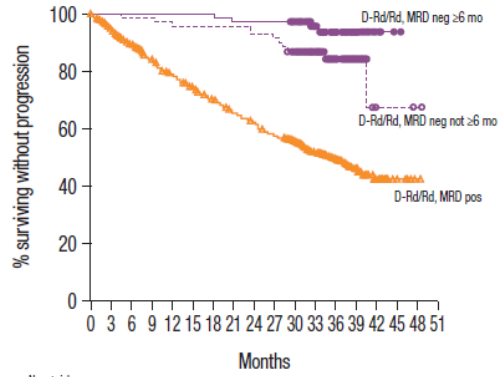

| No. at risk                | 0   | 3   | 6   | 9   | 12  | 15  | 18  | 21  | 24  | 27  | 30  | 33  | 36  | 39 | 42 | 45 | 48 | 51 |   |   |   |
|----------------------------|-----|-----|-----|-----|-----|-----|-----|-----|-----|-----|-----|-----|-----|----|----|----|----|----|---|---|---|
| D-Rd/Rd, MRD neg ≥6 mo     | 71  | 71  | 71  | 71  | 71  | 71  | 69  | 69  | 69  | 66  | 66  | 66  | 64  | 63 | 56 | 39 | 26 | 11 | 2 | 0 | 0 |
| D-Rd/Rd, MRD neg not ≥6 mo | 69  | 69  | 68  | 68  | 66  | 66  | 66  | 66  | 64  | 63  | 56  | 39  | 26  | 11 | 2  | 2  | 1  | 0  | 0 | 0 | 0 |
| D-Rd/Rd, MRD pos           | 597 | 540 | 503 | 461 | 426 | 399 | 372 | 345 | 327 | 301 | 272 | 194 | 127 | 69 | 26 | 5  | 1  | 0  | 0 | 0 | 0 |

**B. ALCYONE**

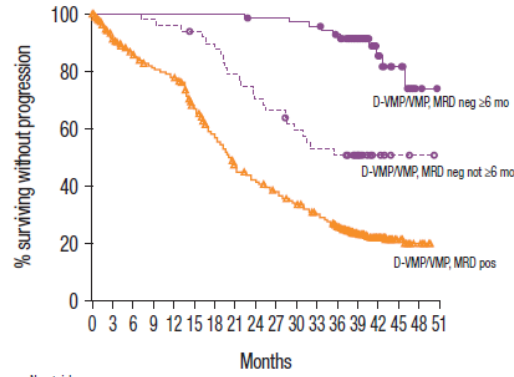

| No. at risk                  | 0   | 3   | 6   | 9   | 12  | 15  | 18  | 21  | 24  | 27  | 30  | 33  | 36  | 39 | 42 | 45 | 48 | 51 |
|------------------------------|-----|-----|-----|-----|-----|-----|-----|-----|-----|-----|-----|-----|-----|----|----|----|----|----|
| D-VMP/VMP, MRD neg ≥6 mo     | 71  | 71  | 71  | 71  | 71  | 71  | 71  | 69  | 69  | 68  | 67  | 63  | 47  | 23 | 13 | 3  | 0  | 0  |
| D-VMP/VMP, MRD neg not ≥6 mo | 48  | 48  | 48  | 47  | 46  | 44  | 42  | 37  | 33  | 31  | 27  | 24  | 23  | 14 | 6  | 2  | 1  | 0  |
| D-VMP/VMP, MRD pos           | 587 | 507 | 471 | 443 | 421 | 357 | 301 | 240 | 215 | 195 | 171 | 149 | 125 | 81 | 49 | 18 | 5  | 0  |

**C. Pooled**

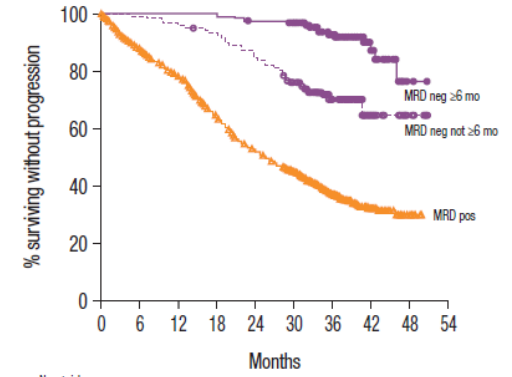

| No. at risk       | 0    | 6   | 12  | 18  | 24  | 30  | 36  | 42 | 48 | 54 |
|-------------------|------|-----|-----|-----|-----|-----|-----|----|----|----|
| MRD neg ≥6 mo     | 142  | 142 | 142 | 142 | 138 | 134 | 105 | 29 | 3  | 0  |
| MRD neg not ≥6 mo | 117  | 116 | 112 | 108 | 97  | 83  | 49  | 8  | 2  | 0  |
| MRD pos           | 1184 | 974 | 847 | 673 | 542 | 443 | 252 | 75 | 6  | 0  |

**D. MAIA**

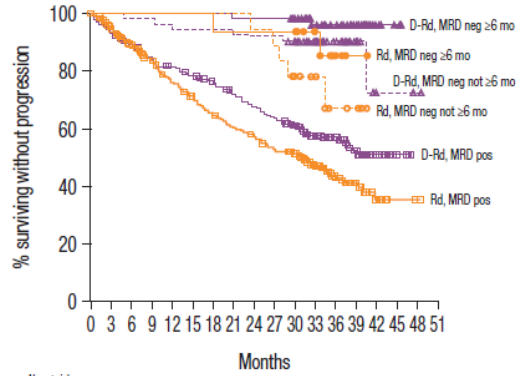

| No. at risk             | 0   | 3   | 6   | 9   | 12  | 15  | 18  | 21  | 24  | 27  | 30  | 33  | 36 | 39 | 42 | 45 | 48 | 51 |
|-------------------------|-----|-----|-----|-----|-----|-----|-----|-----|-----|-----|-----|-----|----|----|----|----|----|----|
| Rd, MRD neg ≥6 mo       | 16  | 16  | 16  | 16  | 16  | 16  | 15  | 15  | 15  | 11  | 6   | 1   | 0  | 0  | 0  | 0  | 0  |    |
| D-Rd, MRD neg ≥6 mo     | 55  | 55  | 55  | 55  | 55  | 55  | 54  | 54  | 54  | 51  | 43  | 36  | 22 | 6  | 2  | 0  | 0  |    |
| Rd, MRD neg not ≥6 mo   | 18  | 18  | 18  | 18  | 18  | 18  | 18  | 17  | 16  | 12  | 9   | 4   | 3  | 0  | 0  | 0  | 0  |    |
| D-Rd, MRD neg not ≥6 mo | 51  | 51  | 50  | 50  | 48  | 48  | 48  | 47  | 44  | 30  | 22  | 8   | 2  | 2  | 1  | 0  | 0  |    |
| Rd, MRD pos             | 335 | 299 | 273 | 246 | 220 | 202 | 185 | 171 | 162 | 146 | 134 | 93  | 54 | 29 | 10 | 2  | 1  | 0  |
| D-Rd, MRD pos           | 262 | 241 | 230 | 215 | 206 | 197 | 187 | 174 | 165 | 155 | 138 | 101 | 73 | 40 | 16 | 3  | 0  | 0  |

**E. ALCYONE**

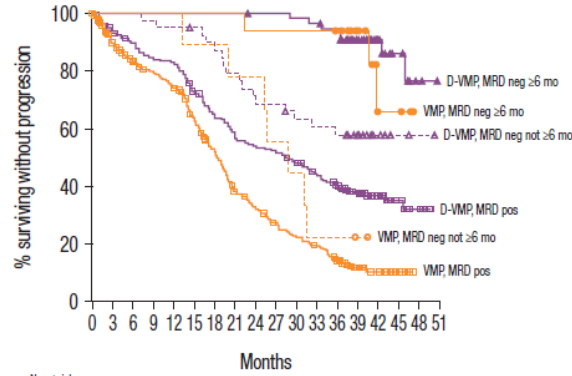

| No. at risk              | 0   | 3   | 6   | 9   | 12  | 15  | 18  | 21  | 24  | 27  | 30  | 33 | 36 | 39 | 42 | 45 | 48 | 51 |
|--------------------------|-----|-----|-----|-----|-----|-----|-----|-----|-----|-----|-----|----|----|----|----|----|----|----|
| VMP, MRD neg ≥6 mo       | 16  | 16  | 16  | 16  | 16  | 16  | 16  | 15  | 15  | 15  | 14  | 10 | 3  | 3  | 0  | 0  | 0  |    |
| D-VMP, MRD neg ≥6 mo     | 55  | 55  | 55  | 55  | 55  | 55  | 55  | 54  | 54  | 53  | 52  | 49 | 37 | 20 | 10 | 3  | 0  |    |
| VMP, MRD neg not ≥6 mo   | 9   | 9   | 9   | 9   | 8   | 8   | 7   | 7   | 5   | 4   | 2   | 2  | 1  | 0  | 0  | 0  | 0  |    |
| D-VMP, MRD neg not ≥6 mo | 39  | 39  | 39  | 38  | 37  | 36  | 34  | 30  | 26  | 26  | 23  | 22 | 21 | 13 | 6  | 2  | 1  |    |
| VMP, MRD pos             | 331 | 279 | 253 | 238 | 221 | 183 | 147 | 105 | 88  | 73  | 59  | 50 | 35 | 18 | 12 | 4  | 0  |    |
| D-VMP, MRD pos           | 256 | 228 | 218 | 205 | 200 | 174 | 154 | 135 | 127 | 122 | 112 | 99 | 63 | 37 | 14 | 5  | 0  |    |

**Supplemental Figure 4. PFS by treatment group based on sustained MRD negativity ( $10^{-5}$ ;  $\geq 12$  months) in MAIA (A) and ALCYONE (B).** Shown are Kaplan-Meier estimates of PFS by sustained MRD negativity lasting  $\geq 12$  months among patients in the ITT populations. MRD status was assessed at a threshold of 1 tumor cell per  $10^5$  white blood cells. Purple lines show regimens containing daratumumab (D-Rd and D-VMP); orange lines show standard of care regimens (Rd and VMP). PFS for patients with sustained MRD negativity lasting  $\geq 12$  months was previously reported for ALCYONE.<sup>11</sup> PFS, progression-free survival; MRD, minimal residual disease; ITT, intent to treat; D-Rd, daratumumab plus lenalidomide/dexamethasone; D-VMP, daratumumab plus bortezomib/melphalan/prednisone; Rd, lenalidomide/dexamethasone; VMP, bortezomib/melphalan/prednisone.

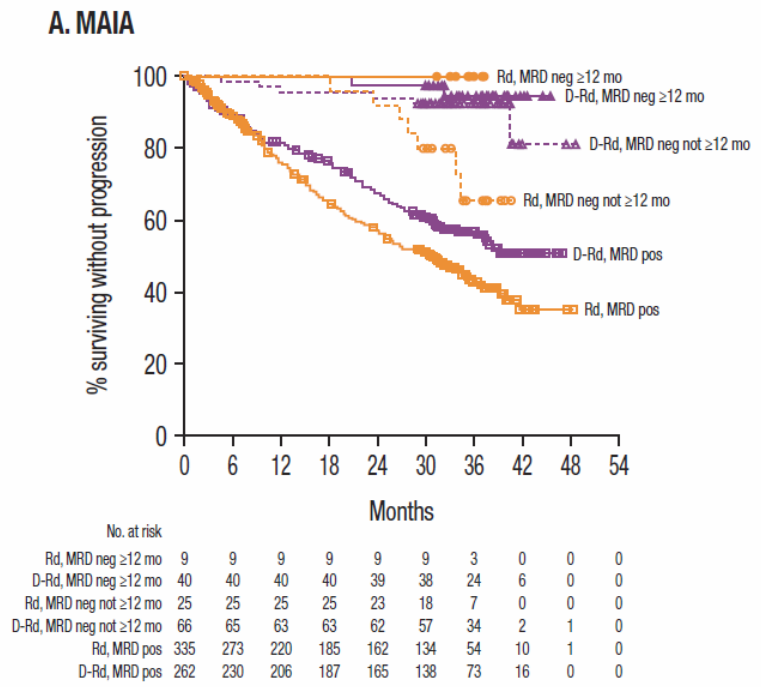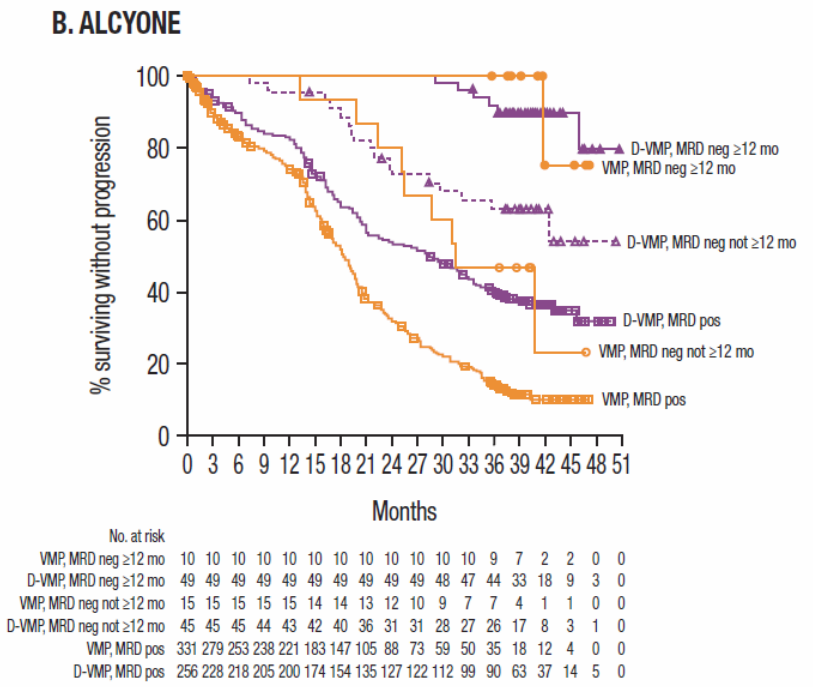

**Supplemental Figure 5. PFS based on sustained MRD ( $10^{-5}$ ) negativity lasting  $\geq 6$  months (A) or  $\geq 12$  months (B) in the pooled daratumumab-based combination groups (D-Rd/D-VMP) versus the pooled control groups (Rd/VMP) in MAIA and ALCYONE.** Shown are the results of the Kaplan-Meier estimates of PFS among patients in the ITT population based on the absence of MRD at a threshold of 1 tumor cell per  $10^5$  white blood cells or on sustained MRD negativity at  $\geq 6$  or  $\geq 12$  months at a threshold of 1 tumor cell per  $10^5$  white blood cells. PFS, progression-free survival; MRD, minimal residual disease; D-Rd, daratumumab plus lenalidomide/dexamethasone; D-VMP, daratumumab plus bortezomib/melphalan/prednisone; Rd, lenalidomide/dexamethasone; VMP, bortezomib/melphalan/prednisone; ITT, intent to treat.

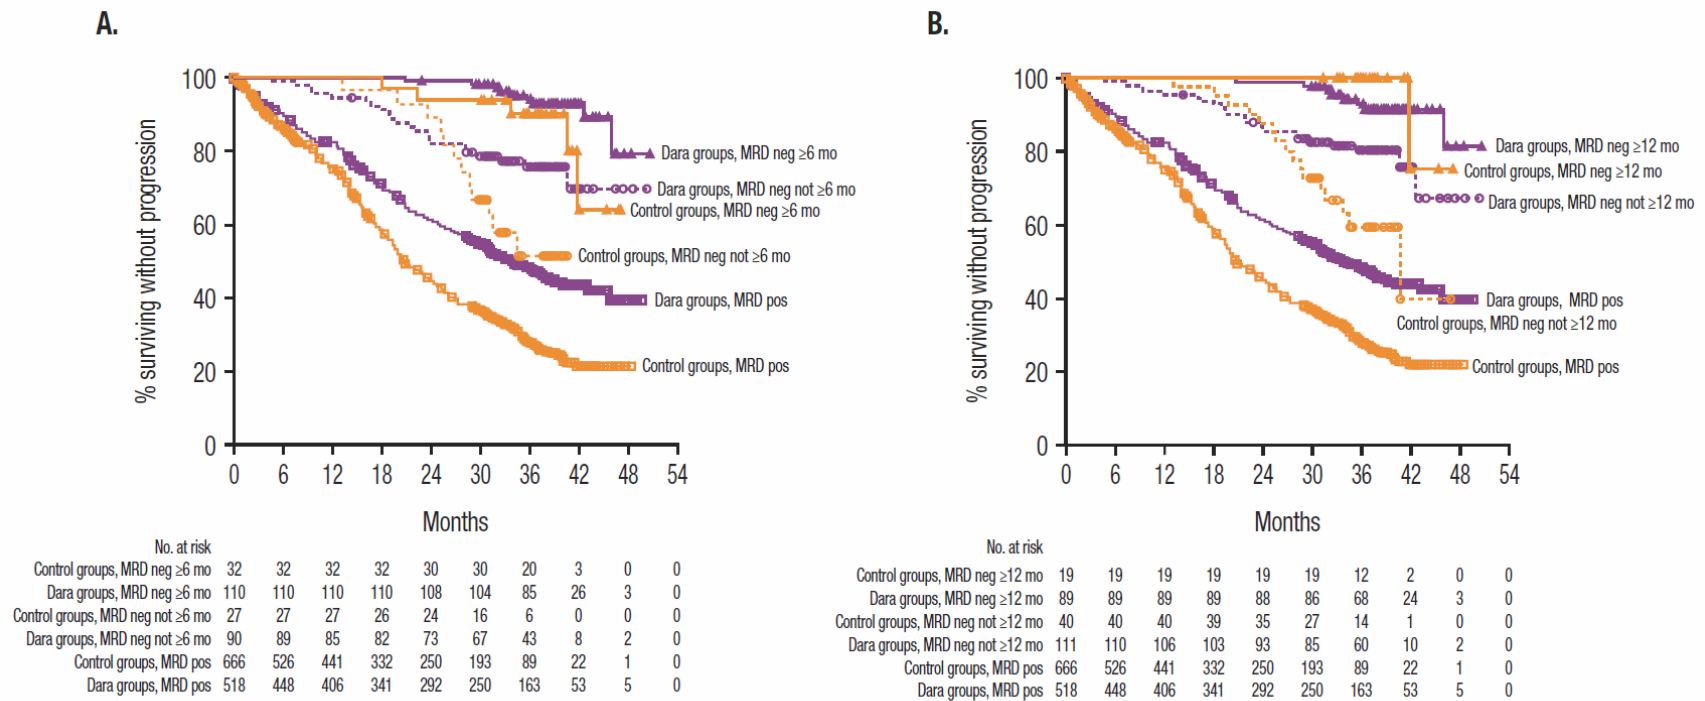

Supplement: 10.1182-2020010439_bloodbld2020010439-suppl1.pdf [file 10.1182-2020010439_bloodbld2020010439-suppl1.pdf]
